# Supplementary material for: Anthocyanin Accumulation and Related Gene Expression Profile in ‘Red Zaosu’ Pear and Its Green Mutant
Source: MDPI journal article supplement (doi:10.3390/agriculture11090898), 2021-09-18
Supplement: s1 [file s1]

Table S1. Primers used for qRT-PCR.

| Primer         | Genbank no. | Forward Primers (5'-3') | Reverse Primers (5'-3') |
|----------------|-------------|-------------------------|-------------------------|
| <i>PbACTIN</i> | CN938023    | CCATCCAGGCTGTTCTCTC     | GCAAGGTCCAGACGAAGG      |
| <i>PbPAL</i>   | KR024005    | GAAGTGCTACAGAATCAG      | GAATCTTATGCCAGAGTAG     |
| <i>PbCHS</i>   | KF387513    | GGACTTACATTTACCTT       | CAACTTGGACTCTACTTG      |
| <i>PbCHI</i>   | EF446163    | CCTCTATTCTCTTCACAC      | GTTCAACAGTTCGGATAA      |
| <i>PbF3H</i>   | KF438228    | CAAGAAGAAGATGAGCAA      | CTTTATCTCCACTTTGTCT     |
| <i>PbDFR</i>   | KF387515    | CATTATGGCATCATCAAG      | CAAGTTCGTGAATTGTAG      |
| <i>PbANS</i>   | KM588895    | CCTCTGGTAAGATTCAAG      | TTGCCTCAATGTAATCAG      |
| <i>PbMYB10</i> | KT601121    | AGACCAATGTGATAAGAC      | TCTGCTGATTGAATATGT      |
